# Supplementary material
Source: PubMed Central journal article supplement (PMC6609663)
Supplement: 11420_2018_9644_MOESM1_ESM.pdf [file 11420_2018_9644_MOESM1_ESM.pdf]

Supplementary content for: Safdieh and colleagues: *Pediatric Septic Arthritis and Osteomyelitis in the US: A National KID Database Analysis. HSS Journal 2018.*

**ICD Diagnosis and Procedure Codes**

| Septic Arthritis      |                                             |
|-----------------------|---------------------------------------------|
| ICD-9                 | Diagnosis Description                       |
| 711                   | Pyogenic arthritis, site unspecified        |
| 71101                 | Pyogenic arthritis, shoulder region         |
| 71102                 | Pyogenic arthritis, upper arm               |
| 71103                 | Pyogenic arthritis, forearm                 |
| 71104                 | Pyogenic arthritis, hand                    |
| 71105                 | Pyogenic arthritis, pelvic region and thigh |
| 71106                 | Pyogenic arthritis, lower leg               |
| 71107                 | Pyogenic arthritis, ankle and foot          |
| 71108                 | Pyogenic arthritis, other specified sites   |
| 71109                 | Pyogenic arthritis, multiple sites          |
| Osteomyelitis         |                                             |
| 730                   | site unspecified                            |
| 73001                 | shoulder region                             |
| 73002                 | upper arm                                   |
| 73003                 | Forearm                                     |
| 73004                 | Hand                                        |
| 73005                 | pelvic region and thigh                     |
| 73006                 | lower leg                                   |
| 73007                 | ankle and foot                              |
| 73008                 | other specified sites                       |
| 73009                 | multiple site                               |
| Acute osteomyelitis   |                                             |
| 730                   | site unspecified                            |
| 73001                 | shoulder region                             |
| 73002                 | upper arm                                   |
| 73003                 | Forearm                                     |
| 73004                 | Hand                                        |
| 73005                 | pelvic region and thigh                     |
| 73006                 | lower leg                                   |
| 73007                 | ankle and foot                              |
| 73008                 | other specified sites                       |
| 73009                 | multiple site                               |
| Chronic osteomyelitis |                                             |
| 7301                  | site unspecified                            |
| 73011                 | shoulder region                             |
| 73012                 | upper arm                                   |
| 73013                 | Forearm                                     |
| 73014                 | Hand                                        |

|                                |                         |
|--------------------------------|-------------------------|
| 73015                          | pelvic region and thigh |
| 73016                          | lower leg               |
| 73017                          | ankle and foot          |
| 73018                          | other specified sites   |
| 73019                          | multiple site           |
| Unspecified osteomyelitis      |                         |
| 7302                           | site unspecified        |
| 73021                          | shoulder region         |
| 73022                          | upper arm               |
| 73023                          | Forearm                 |
| 73024                          | Hand                    |
| 73025                          | pelvic region and thigh |
| 73026                          | lower leg               |
| 73027                          | ankle and foot          |
| 73028                          | other specified sites   |
| 73029                          | multiple site           |
| Periostitis                    |                         |
| 7303                           | site unspecified        |
| 73031                          | shoulder region         |
| 73032                          | upper arm               |
| 73033                          | Forearm                 |
| 73034                          | Hand                    |
| 73035                          | pelvic region and thigh |
| 73036                          | lower leg               |
| 73037                          | ankle and foot          |
| 73038                          | other specified sites   |
| 73039                          | multiple site           |
| Other infection involving bone |                         |
| 7308                           | site unspecified        |
| 73081                          | shoulder region         |
| 73082                          | upper arm               |
| 73083                          | Forearm                 |
| 73084                          | Hand                    |
| 73085                          | pelvic region and thigh |
| 73086                          | lower leg               |
| 73087                          | ankle and foot          |
| 73088                          | other specified sites   |
| 73089                          | multiple site           |
| Unspecified infection of bone  |                         |
| 7309                           | site unspecified        |
| 73091                          | shoulder region         |
| 73092                          | upper arm               |
| 73093                          | Forearm                 |
| 73094                          | Hand                    |
| 73095                          | pelvic region and thigh |
| 73096                          | lower leg               |

|       |                       |
|-------|-----------------------|
| 73097 | ankle and foot        |
| 73098 | other specified sites |
| 73099 | multiple site         |

**Table 2 ICD-9 Procedure Codes**

|                           |                                                                                                           |
|---------------------------|-----------------------------------------------------------------------------------------------------------|
| Bone biopsy               |                                                                                                           |
| ICD-9                     | Code Description                                                                                          |
| 7740                      | Biopsy of bone, unspecified site                                                                          |
| 7741                      | Biopsy of bone, scapula, clavicle, and thorax [ribs and sternum]                                          |
| 7742                      | Biopsy of bone, humerus                                                                                   |
| 7743                      | Biopsy of bone, radius and ulna                                                                           |
| 7744                      | Biopsy of bone, carpals and metacarpals                                                                   |
| 7745                      | Biopsy of bone, femur                                                                                     |
| 7746                      | Biopsy of bone, patella                                                                                   |
| 7747                      | Biopsy of bone, tibia and fibula                                                                          |
| 7748                      | Biopsy of bone, tarsals and metatarsals                                                                   |
| 7749                      | Biopsy of bone, other bones                                                                               |
| Bone diagnostic procedure |                                                                                                           |
| 7880                      | Diagnostic procedures on bone, not elsewhere classified, unspecified site                                 |
| 7881                      | Diagnostic procedures on bone, not elsewhere classified, scapula, clavicle, and thorax [ribs and sternum] |
| 7882                      | Diagnostic procedures on bone, not elsewhere classified, humerus                                          |
| 7883                      | Diagnostic procedures on bone, not elsewhere classified, radius and ulna                                  |
| 7884                      | Diagnostic procedures on bone, not elsewhere classified, carpals and metacarpals                          |
| 7885                      | Diagnostic procedures on bone, not elsewhere classified, femur                                            |
| 7886                      | Diagnostic procedures on bone, not elsewhere classified, patella                                          |
| 7887                      | Diagnostic procedures on bone, not elsewhere classified, tibia and fibula                                 |
| 7888                      | Diagnostic procedures on bone, not elsewhere classified, tarsals and metatarsals                          |
| 7889                      | Diagnostic procedures on bone, not elsewhere classified, other bones                                      |
| Joint biopsy              |                                                                                                           |
| 8030                      | Biopsy of joint structure, unspecified site                                                               |
| 8031                      | Biopsy of joint structure, shoulder                                                                       |
| 8032                      | Biopsy of joint structure, elbow                                                                          |
| 8033                      | Biopsy of joint structure, wrist                                                                          |
| 8034                      | Biopsy of joint structure, hand and finger                                                                |
| 8035                      | Biopsy of joint structure, hip                                                                            |
| 8036                      | Biopsy of joint structure, knee                                                                           |
| 8037                      | Biopsy of joint structure, ankle                                                                          |
| 8038                      | Biopsy of joint structure, foot and toe                                                                   |
| 8039                      | Biopsy of joint structure, other specified sites                                                          |

|                                      |                                                                                          |
|--------------------------------------|------------------------------------------------------------------------------------------|
| Other diagnostic procedure           |                                                                                          |
| 8394                                 | Aspiration of bursa                                                                      |
| 8395                                 | Aspiration of other soft tissue                                                          |
| 8191                                 | Arthrocentesis                                                                           |
| 8192                                 | Injection of therapeutic substance into joint or ligament                                |
| 8198                                 | Other diagnostic procedures on joint structures                                          |
| 8321                                 | Open biopsy of soft tissue                                                               |
| 8329                                 | Other diagnostic procedures on muscle, tendon, fascia, and bursa, including that of hand |
| Arthrotomy for removal of prosthesis |                                                                                          |
| 8000                                 | Arthrotomy for removal of prosthesis without replacement, unspecified site               |
| 8001                                 | Arthrotomy for removal of prosthesis without replacement, shoulder                       |
| 8002                                 | Arthrotomy for removal of prosthesis without replacement, elbow                          |
| 8003                                 | Arthrotomy for removal of prosthesis without replacement, wrist                          |
| 8004                                 | Arthrotomy for removal of prosthesis without replacement, hand and finger                |
| 8005                                 | Arthrotomy for removal of prosthesis without replacement, hip                            |
| 8006                                 | Arthrotomy for removal of prosthesis without replacement, knee                           |
| 8007                                 | Arthrotomy for removal of prosthesis without replacement, ankle                          |
| 8008                                 | Arthrotomy for removal of prosthesis without replacement, foot and toe                   |
| 8009                                 | Arthrotomy for removal of prosthesis without replacement, other specified sites          |
| Other arthrotomy                     |                                                                                          |
| 8010                                 | Other arthrotomy, unspecified site                                                       |
| 8011                                 | Other arthrotomy, shoulder                                                               |
| 8012                                 | Other arthrotomy, elbow                                                                  |
| 8013                                 | Other arthrotomy, wrist                                                                  |
| 8014                                 | Other arthrotomy, hand and finger                                                        |
| 8015                                 | Other arthrotomy, hip                                                                    |
| 8016                                 | Other arthrotomy, knee                                                                   |
| 8017                                 | Other arthrotomy, ankle                                                                  |
| 8018                                 | Other arthrotomy, foot and toe                                                           |
| 8019                                 | Other arthrotomy, other specified sites                                                  |
| Arthroscopy                          |                                                                                          |
| 8020                                 | Arthroscopy, unspecified site                                                            |
| 8021                                 | Arthroscopy, shoulder                                                                    |
| 8022                                 | Arthroscopy, elbow                                                                       |
| 8023                                 | Arthroscopy, wrist                                                                       |
| 8024                                 | Arthroscopy, hand and finger                                                             |
| 8025                                 | Arthroscopy, hip                                                                         |
| 8026                                 | Arthroscopy, knee                                                                        |
| 8027                                 | Arthroscopy, ankle                                                                       |
| 8028                                 | Arthroscopy, foot and toe                                                                |
| 8029                                 | Arthroscopy, other specified sites                                                       |
| Division of joint capsule            |                                                                                          |
| 8040                                 | Division of joint capsule, ligament, or cartilage, unspecified site                      |
| 8041                                 | Division of joint capsule, ligament, or cartilage, shoulder                              |

|                       |                                                                          |
|-----------------------|--------------------------------------------------------------------------|
| 8042                  | Division of joint capsule, ligament, or cartilage, elbow                 |
| 8043                  | Division of joint capsule, ligament, or cartilage, wrist                 |
| 8044                  | Division of joint capsule, ligament, or cartilage, hand and finger       |
| 8045                  | Division of joint capsule, ligament, or cartilage, hip                   |
| 8046                  | Division of joint capsule, ligament, or cartilage, knee                  |
| 8047                  | Division of joint capsule, ligament, or cartilage, ankle                 |
| 8048                  | Division of joint capsule, ligament, or cartilage, foot and toe          |
| 8049                  | Division of joint capsule, ligament, or cartilage, other specified sites |
| Excision              |                                                                          |
| 8080                  | Arthroscopy, unspecified site                                            |
| 8081                  | Arthroscopy, shoulder                                                    |
| 8082                  | Arthroscopy, elbow                                                       |
| 8083                  | Arthroscopy, wrist                                                       |
| 8084                  | Arthroscopy, hand and finger                                             |
| 8085                  | Arthroscopy, hip                                                         |
| 8086                  | Arthroscopy, knee                                                        |
| 8087                  | Arthroscopy, ankle                                                       |
| 8088                  | Arthroscopy, foot and toe                                                |
| 8089                  | Arthroscopy, other specified sites                                       |
| 8090                  | Other excision of joint, unspecified site                                |
| 8091                  | Other excision of joint, shoulder                                        |
| 8092                  | Other excision of joint, elbow                                           |
| 8093                  | Other excision of joint, wrist                                           |
| 8094                  | Other excision of joint, hand and finger                                 |
| 8095                  | Other excision of joint, hip                                             |
| 8096                  | Other excision of joint, knee                                            |
| 8097                  | Other excision of joint, ankle                                           |
| 8098                  | Other excision of joint, foot and toe                                    |
| 8099                  | Other excision of joint, other specified sites                           |
| 8050                  | Excision or destruction of intervertebral disc, unspecified              |
| 8051                  | Excision of intervertebral disc                                          |
| Synovectomy           |                                                                          |
| 8070                  | Synovectomy, unspecified site                                            |
| 8071                  | Synovectomy, shoulder                                                    |
| 8072                  | Synovectomy, elbow                                                       |
| 8073                  | Synovectomy, wrist                                                       |
| 8074                  | Synovectomy, hand and finger                                             |
| 8075                  | Synovectomy, hip                                                         |
| 8076                  | Synovectomy, knee                                                        |
| 8077                  | Synovectomy, ankle                                                       |
| 8078                  | Synovectomy, foot and toe                                                |
| 8079                  | Synovectomy, other specified sites                                       |
| Other joint operation |                                                                          |
| 8199                  | Other operations on joint structures                                     |
| Sequestrectomy        |                                                                          |
| 7700                  | Sequestrectomy, unspecified site                                         |

|                                         |                                                                                              |
|-----------------------------------------|----------------------------------------------------------------------------------------------|
| 7701                                    | Sequestrectomy, scapula, clavicle, and thorax [ribs and sternum]                             |
| 7702                                    | Sequestrectomy, humerus                                                                      |
| 7703                                    | Sequestrectomy, radius and ulna                                                              |
| 7704                                    | Sequestrectomy, carpals and metacarpals                                                      |
| 7705                                    | Sequestrectomy, femur                                                                        |
| 7706                                    | Sequestrectomy, patella                                                                      |
| 7707                                    | Sequestrectomy, tibia and fibula                                                             |
| 7708                                    | Sequestrectomy, tarsals and metatarsals                                                      |
| 7709                                    | Sequestrectomy, other bones                                                                  |
| Bone incision                           |                                                                                              |
| 7710                                    | Other incision of bone without division, unspecified site                                    |
| 7711                                    | Other incision of bone without division, scapula, clavicle, and thorax [ribs and sternum]    |
| 7712                                    | Other incision of bone without division, humerus                                             |
| 7713                                    | Other incision of bone without division, radius and ulna                                     |
| 7714                                    | Other incision of bone without division, carpals and metacarpals                             |
| 7715                                    | Other incision of bone without division, femur                                               |
| 7716                                    | Other incision of bone without division, patella                                             |
| 7717                                    | Other incision of bone without division, tibia and fibula                                    |
| 7718                                    | Other incision of bone without division, tarsals and metatarsals                             |
| 7719                                    | Other incision of bone without division, other bones                                         |
| Bone division                           |                                                                                              |
| 7730                                    | Other division of bone, unspecified site                                                     |
| 7731                                    | Other division of bone, scapula, clavicle, and thorax [ribs and sternum]                     |
| 7732                                    | Other division of bone, humerus                                                              |
| 7733                                    | Other division of bone, radius and ulna                                                      |
| 7734                                    | Other division of bone, carpals and metacarpals                                              |
| 7735                                    | Other division of bone, femur                                                                |
| 7736                                    | Other division of bone, patella                                                              |
| 7737                                    | Other division of bone, tibia and fibula                                                     |
| 7738                                    | Other division of bone, tarsals and metatarsals                                              |
| 7739                                    | Other division of bone, other bones                                                          |
| Local excision of lesion or bone tissue |                                                                                              |
| 7760                                    | Local excision of lesion or tissue of bone, unspecified site                                 |
| 7761                                    | Local excision of lesion or tissue of bone, scapula, clavicle, and thorax [ribs and sternum] |
| 7762                                    | Local excision of lesion or tissue of bone, humerus                                          |
| 7763                                    | Local excision of lesion or tissue of bone, radius and ulna                                  |
| 7764                                    | Local excision of lesion or tissue of bone, carpals and metacarpals                          |
| 7765                                    | Local excision of lesion or tissue of bone, femur                                            |
| 7766                                    | Local excision of lesion or tissue of bone, patella                                          |
| 7767                                    | Local excision of lesion or tissue of bone, tibia and fibula                                 |
| 7768                                    | Local excision of lesion or tissue of bone, tarsals and metatarsals                          |
| 7769                                    | Local excision of lesion or tissue of bone, other bones                                      |
| Ostectomy (partial or total)            |                                                                                              |
| 7782                                    | Other partial ostectomy, humerus                                                             |

|                                           |                                                                                              |
|-------------------------------------------|----------------------------------------------------------------------------------------------|
| 7783                                      | Other partial ostectomy, radius and ulna                                                     |
| 7784                                      | Other partial ostectomy, carpals and metacarpals                                             |
| 7785                                      | Other partial ostectomy, femur                                                               |
| 7786                                      | Other partial ostectomy, patella                                                             |
| 7787                                      | Other partial ostectomy, tibia and fibula                                                    |
| 7788                                      | Other partial ostectomy, tarsals and metatarsals                                             |
| 7789                                      | Other partial ostectomy, other bones                                                         |
| 7790                                      | Total ostectomy, unspecified site                                                            |
| 7791                                      | Total ostectomy, scapula, clavicle, and thorax [ribs and sternum]                            |
| 7792                                      | Total ostectomy, humerus                                                                     |
| 7793                                      | Total ostectomy, radius and ulna                                                             |
| 7794                                      | Total ostectomy, carpals and metacarpals                                                     |
| 7795                                      | Total ostectomy, femur                                                                       |
| 7796                                      | Total ostectomy, patella                                                                     |
| 7797                                      | Total ostectomy, tibia and fibula                                                            |
| 7798                                      | Total ostectomy, tarsals and metatarsals                                                     |
| 7799                                      | Total ostectomy, other bones                                                                 |
| Other repair or plastic operation on bone |                                                                                              |
| 7840                                      | Other repair or plastic operations on bone, unspecified site                                 |
| 7841                                      | Other repair or plastic operations on bone, scapula, clavicle, and thorax [ribs and sternum] |
| 7842                                      | Other repair or plastic operations on bone, humerus                                          |
| 7843                                      | Other repair or plastic operations on bone, radius and ulna                                  |
| 7844                                      | Other repair or plastic operations on bone, carpals and metacarpals                          |
| 7845                                      | Other repair or plastic operations on bone, femur                                            |
| 7846                                      | Other repair or plastic operations on bone, patella                                          |
| 7847                                      | Other repair or plastic operations on bone, tibia and fibula                                 |
| 7848                                      | Other repair or plastic operations on bone, tarsals and metatarsals                          |
| 7849                                      | Other repair or plastic operations on bone, other bones                                      |
| Removal of implanted device from bone     |                                                                                              |
| 7860                                      | Removal of implanted devices from bone, unspecified site                                     |
| 7861                                      | Removal of implanted devices from bone, scapula, clavicle, and thorax [ribs and sternum]     |
| 7862                                      | Removal of implanted devices from bone, humerus                                              |
| 7863                                      | Removal of implanted devices from bone, radius and ulna                                      |
| 7864                                      | Removal of implanted devices from bone, carpals and metacarpals                              |
| 7865                                      | Removal of implanted devices from bone, femur                                                |
| 7866                                      | Removal of implanted devices from bone, patella                                              |
| 7867                                      | Removal of implanted devices from bone, tibia and fibula                                     |
| 7868                                      | Removal of implanted devices from bone, tarsals and metatarsals                              |
| 7869                                      | Removal of implanted devices from bone, other bones                                          |
| Debridement                               |                                                                                              |
| 7961                                      | Removal of implanted devices from bone, unspecified site                                     |
| 7962                                      | Removal of implanted devices from bone, scapula, clavicle, and thorax [ribs and sternum]     |
| 7963                                      | Removal of implanted devices from bone, humerus                                              |

|                           |                                                                 |
|---------------------------|-----------------------------------------------------------------|
| 7964                      | Removal of implanted devices from bone, radius and ulna         |
| 7965                      | Removal of implanted devices from bone, carpals and metacarpals |
| 7966                      | Removal of implanted devices from bone, femur                   |
| 7967                      | Removal of implanted devices from bone, patella                 |
| 7968                      | Removal of implanted devices from bone, tibia and fibula        |
| 7969                      | Removal of implanted devices from bone, tarsals and metatarsals |
| 8622                      | Removal of implanted devices from bone, other bones             |
| 8628                      | Nonexcisional debridement of wound, infection or burn           |
| Other irrigation of wound |                                                                 |
| 9659                      | Other irrigation of wound                                       |
